# Supplementary material for: The Impacts of Dam Construction and Removal on the Genetics of Recovering Steelhead (Oncorhynchus mykiss) Populations across the Elwha River Watershed
Source: MDPI journal article supplement (doi:10.3390/genes12010089), 2021-01-13
Supplement: s1 [file s1]

## Supplementary Materials

**Table S1.** Summary alignment and quality filtering statistics for read pairs across the 1,123 samples retained for downstream analyses from the original RADsequencing of 1,334 samples.

|                         | Population                              | Sample Size | Sum of Quality Filtered Reads | Sum of Clone Filtered Read Pairs | Sum of Mapped Read Pairs | Average Percent Reads Mapped |
|-------------------------|-----------------------------------------|-------------|-------------------------------|----------------------------------|--------------------------|------------------------------|
| <b>Pre-Dam Removal</b>  | Above the Dams (AD)                     | 208         | 214853211                     | 74787568                         | 146324196                | 97.48                        |
|                         | In Between the Dams (ID)                | 169         | 194678581                     | 70081716                         | 137204353                | 97.46                        |
|                         | South Branch of the Little River (SBLR) | 86          | 89071386                      | 34666100                         | 67962209                 | 97.39                        |
|                         | Below the Dams (BD)                     | 104         | 128606386                     | 37176209                         | 72791991                 | 97.41                        |
| <b>Post-Dam Removal</b> | Above the Dams (AD)                     | 3           | 6201694                       | 4174262                          | 8142605                  | 97.15                        |
|                         | In Between the Dams (ID)                | 304         | 480555579                     | 317623165                        | 621223732                | 97.15                        |
|                         | Below the Dams (BD)                     | 249         | 597275595                     | 323771647                        | 633175507                | 97.35                        |

**Table S2.** Mean population genetics statistics calculated in VCFtools ( $\pi$ , Tajima's D,  $A_{jk}$ ), NeEstimator v2 ( $N_e$ ), and the inbreeding coefficient ( $F_{IS}$ ) temporally, across sampling location, among life history forms, and across life history cohorts. Confidence intervals represent non-parametric bootstrapped 95% confidence intervals for all estimates except for  $N_e$  which represent internally calculated 95% credible intervals.

|                             |                | Nucleotide Diversity ( $\pi$ ) | Tajima's D        | Relatedness ( $A_{jk}$ ) | Inbreeding Coefficient ( $F_{IS}$ ) | Effective Population Size ( $N_e$ ) | Total non-polymorphic loci | Number of Individuals |
|-----------------------------|----------------|--------------------------------|-------------------|--------------------------|-------------------------------------|-------------------------------------|----------------------------|-----------------------|
| <b>Prior to dam removal</b> | <b>All</b>     | 0.056 +<br>0.078               | -0.42 +<br>0.58   | 0.0017 +<br>0.072        | 0.030 +<br>0.10                     | 80.3.1<br>(66.6-97.0)               | 1,230                      | 567                   |
|                             |                | 0.056 +<br>0.080               | -0.41 +<br>0.518  | 0.0021 +<br>0.081        | 0.032 +<br>0.10                     | 58.4<br>(49.7-68.5)                 | 1,617                      | 463                   |
|                             | <b>Unknown</b> | 0.053 +<br>0.081               | -0.60 +<br>0.553  | 0.0090 +<br>0.140        | -0.0060 +<br>0.10                   | 141.3<br>(102.8-213.8)              | 7,152                      | 104                   |
|                             |                | 0.053 +<br>0.083               | -0.46 +<br>0.578  | 0.0047 + 0.11            | 0.027 +<br>0.11                     | 120.9<br>(97.1-154.6)               | 7,563                      | 208                   |
|                             | <b>AD</b>      | 0.061 +<br>0.085               | -0.449 +<br>0.562 | 0.0057 + 0.11            | 0.028 +<br>0.11                     | 150.7                               | 4,127                      | 169                   |
|                             |                |                                |                   |                          |                                     |                                     |                            |                       |
|                             | <b>ID</b>      |                                |                   |                          |                                     |                                     |                            |                       |
|                             |                |                                |                   |                          |                                     |                                     |                            |                       |

|                         |                        |               |                |               |                |                                      |        |     |
|-------------------------|------------------------|---------------|----------------|---------------|----------------|--------------------------------------|--------|-----|
|                         | <b>SBLR</b>            | 0.044 + 0.11  | -0.082 + 0.899 | 0.018 + 0.16  | 0.011 + 0.12   | (109.4-114.7)<br>38.3<br>(26.5-58.3) | 28,727 | 86  |
|                         | <b>BD</b>              | 0.053 + 0.081 | -0.60 + 0.556  | 0.0090 + 0.14 | -0.038 + 0.16  | 141.3<br>(102.8-213.8)               | 7,144  | 104 |
| <b>Post dam removal</b> | <b>All (Steelhead)</b> | 0.058 + 0.083 | -0.361 + 0.572 | 0.002 + 0.066 | 0.011 + 0.078  | 139.7<br>(112.5-171.8)               | 3,786  | 556 |
|                         | <b>Adults Pre 2015</b> | 0.054 + 0.086 | -0.624 + 0.59  | 0.017 + 0.19  | 0.0079 + 0.11  | 159.6<br>(99.3-356.4)                | 10,159 | 57  |
|                         | <b>Adults 2015</b>     | 0.057 + 0.090 | -0.437 + 0.620 | 0.006 + 0.12  | 0.011 + 0.11   | 63.2<br>(52.6-76.9)                  | 5,913  | 172 |
|                         | <b>Adults 2016</b>     | 0.060 + 0.10  | -0.645 + 0.65  | 0.0047 + 0.11 | 0.0065 + 0.17  | 132.1<br>(80.6-332.1)                | 16,008 | 24  |
|                         | <b>Adults 2017</b>     | 0.061 + 0.10  | -0.674 + 0.665 | 0.051 + 0.32  | -0.002 + 0.167 | 44<br>(21-406.8)                     | 17,949 | 18  |
|                         | <b>Juveniles 2016</b>  | 0.058 + 0.082 | -0.511 + 0.552 | 0.0059 + 0.11 | 0.0067 + 0.10  | 264.9<br>(194.3-311.8)               | 2,176  | 166 |
|                         | <b>Juveniles 2017</b>  | 0.057 + 0.083 | -0.56 + 0.554  | 0.0081 + 0.13 | 0.003 + 0.12   | 341.2<br>(323.2-347.4)               | 3,570  | 119 |

**Table S3.** The results from simulations performed on all 479 individuals included in the reference collections reflected mixed results for accuracy of assignment of individual fish back to their respected reference collections, or sampling sites, based on their genotypes. The probabilities for self-assignment of individuals back to their sampling site were calculated by taking the mean of the scaled likelihoods. The scaled likelihoods reflect the probability of assigning an individual fish to the inferred collection.

| Sampling Site             | Inferred Sampling Site |              |              |              |              |              |              |                  |               |              |              |              |                           |              |
|---------------------------|------------------------|--------------|--------------|--------------|--------------|--------------|--------------|------------------|---------------|--------------|--------------|--------------|---------------------------|--------------|
|                           | Chicago Camp           | Wilder       | Hayes        | Elkhorn      | Geyser       | Cat Creek    | Altaire      | Campground Creek | Madison Creek | Little River | Indian Creek | Aldwell      | South Branch Little River | Elwha River  |
| Chicago Camp              | <b>1.000</b>           | 0.000        | 0.000        | 0.000        | 0.000        | 0.000        | 0.000        | 0.000            | 0.000         | 0.000        | 0.000        | 0.000        | 0.000                     | 0.000        |
| Wilder                    | 0.000                  | <b>0.246</b> | 0.156        | 0.442        | 0.043        | 0.114        | 0.000        | 0.000            | 0.000         | 0.000        | 0.000        | 0.000        | 0.000                     | 0.000        |
| Hayes                     | 0.000                  | 0.272        | <b>0.215</b> | 0.384        | 0.000        | 0.129        | 0.000        | 0.000            | 0.000         | 0.000        | 0.000        | 0.000        | 0.000                     | 0.000        |
| Elkhorn                   | 0.000                  | 0.032        | 0.078        | <b>0.823</b> | 0.066        | 0.001        | 0.000        | 0.000            | 0.000         | 0.000        | 0.000        | 0.000        | 0.000                     | 0.000        |
| Geyser                    | 0.000                  | 0.027        | 0.007        | 0.319        | <b>0.542</b> | 0.105        | 0.000        | 0.000            | 0.000         | 0.000        | 0.000        | 0.000        | 0.000                     | 0.000        |
| Cat Creek                 | 0.000                  | 0.000        | 0.000        | 0.015        | 0.985        | <b>0.000</b> | 0.000        | 0.000            | 0.000         | 0.000        | 0.000        | 0.000        | 0.000                     | 0.000        |
| Altaire                   | 0.000                  | 0.000        | 0.000        | 0.000        | 0.000        | 0.004        | <b>0.314</b> | 0.341            | 0.074         | 0.132        | 0.000        | 0.136        | 0.000                     | 0.000        |
| Campground Creek          | 0.000                  | 0.000        | 0.000        | 0.000        | 0.000        | 0.105        | 0.239        | <b>0.233</b>     | 0.102         | 0.193        | 0.000        | 0.128        | 0.000                     | 0.000        |
| Madison Creek             | 0.000                  | 0.000        | 0.000        | 0.000        | 0.000        | 0.000        | 0.046        | 0.033            | <b>0.581</b>  | 0.259        | 0.000        | 0.081        | 0.000                     | 0.000        |
| Little River              | 0.000                  | 0.000        | 0.000        | 0.000        | 0.000        | 0.000        | 0.000        | 0.000            | 0.060         | <b>0.917</b> | 0.000        | 0.023        | 0.000                     | 0.000        |
| Indian Creek              | 0.000                  | 0.000        | 0.000        | 0.000        | 0.000        | 0.000        | 0.000        | 0.000            | 0.000         | 0.000        | <b>1.000</b> | 0.000        | 0.000                     | 0.000        |
| Aldwell                   | 0.000                  | 0.000        | 0.000        | 0.000        | 0.000        | 0.000        | 0.255        | 0.274            | 0.125         | 0.250        | 0.000        | <b>0.096</b> | 0.000                     | 0.000        |
| South Branch Little River | 0.000                  | 0.000        | 0.000        | 0.000        | 0.000        | 0.012        | 0.000        | 0.000            | 0.000         | 0.000        | 0.000        | 0.000        | <b>0.976</b>              | 0.012        |
| Elwha River               | 0.000                  | 0.000        | 0.000        | 0.000        | 0.000        | 0.148        | 0.006        | 0.001            | 0.011         | 0.001        | 0.000        | 0.000        | 0.000                     | <b>0.833</b> |

**Table S4.** Inferred reporting units for the five individuals that had low (<0.9) posterior probabilities of membership to their inferred collection. .

| Life History Cohort | Sample ID            | Inferred Population | Inferred Sample Site | Posterior Probability of Membership | Log Likelihood |
|---------------------|----------------------|---------------------|----------------------|-------------------------------------|----------------|
| Pre Dam Removal     | 34188_008            | ID                  | Altaire              | 0.551                               | -191.159       |
| Juvenile 2016       | 51659_M_042816_smo_2 | AD                  | Elkhorn              | 0.888                               | -234.457       |
| Pre Dam Removal     | 33649_39             | ID                  | Aldwell              | 0.660                               | -231.978       |
| Adult Pre 2015      | 51029_E13_004b       | AD                  | Cat Creek            | 0.720                               | -247.024       |
| Juvenile 2017       | 51786_M_050217_28    | AD                  | Cat Creek            | 0.882                               | -233.127       |

**Table S5.** The mean posterior probability of membership to reference collections for the 86 individuals not included in the reference sampling set due to incongruent sampling location and DAPC population assignments..

| Sampling Sites | Sample ID | Above the Dams (AD) |        |       |         |        |              | In Between the Dams (ID) |                      |                   |                 |                 |             | South Branch Little River (SBLR) | Below the Dams (BD) |
|----------------|-----------|---------------------|--------|-------|---------|--------|--------------|--------------------------|----------------------|-------------------|-----------------|-----------------|-------------|----------------------------------|---------------------|
|                |           | Chicag<br>o<br>Camp | Wilder | Hayes | Elkhorn | Geyser | Cat<br>Creek | Altaire                  | Campgrou<br>nd Creek | Madiso<br>n Creek | Little<br>River | Indian<br>Creek | Aldwel<br>l |                                  |                     |
| Elkhorn        | 33696_011 | 0                   | 0      | 0.01  | 0       | 0.988  | 0.002        | 0                        | 0                    | 0                 | 0               | 0               | 0           | 0                                | 0                   |
| Geyser         | 34186_032 | 0                   | 0      | 0     | 0       | 0      | 0            | 0                        | 0                    | 0                 | 1               | 0               | 0           | 0                                | 0                   |
| Geyser         | 34186_041 | 0                   | 0      | 0     | 0       | 0      | 0            | 0                        | 0                    | 0                 | 1               | 0               | 0           | 0                                | 0                   |
| Whiskey Bend   | 34185_001 | 0                   | 0      | 0     | 0       | 0      | 0            | 0                        | 0                    | 0                 | 1               | 0               | 0           | 0                                | 0                   |
| Whiskey Bend   | 34185_002 | 0                   | 0      | 0     | 0       | 0      | 0            | 0                        | 0                    | 0                 | 1               | 0               | 0           | 0                                | 0                   |
| Whiskey Bend   | 34185_003 | 0                   | 0      | 0     | 0       | 0      | 0            | 0                        | 0                    | 0                 | 0               | 0               | 0           | 0                                | 1                   |
| Whiskey Bend   | 34185_004 | 0                   | 0      | 0     | 0       | 0      | 0            | 0                        | 0                    | 0                 | 0               | 0               | 0           | 0                                | 1                   |
| Whiskey Bend   | 34185_005 | 0                   | 0      | 0     | 0       | 0      | 0            | 0                        | 0                    | 0                 | 1               | 0               | 0           | 0                                | 0                   |
| Whiskey Bend   | 34185_006 | 0                   | 0      | 0     | 0       | 0      | 0            | 0.219                    | 0.781                | 0                 | 0               | 0               | 0           | 0                                | 0                   |
| Whiskey Bend   | 34185_007 | 0                   | 0      | 0     | 0       | 0      | 0            | 0.775                    | 0.004                | 0.214             | 0.006           | 0               | 0           | 0                                | 0                   |
| Whiskey Bend   | 34185_008 | 0                   | 0      | 0     | 0       | 0      | 0            | 1                        | 0                    | 0                 | 0               | 0               | 0           | 0                                | 0                   |
| Whiskey Bend   | 34185_009 | 0                   | 0      | 0     | 0       | 0      | 0            | 0                        | 0                    | 0                 | 1               | 0               | 0           | 0                                | 0                   |
| Whiskey Bend   | 34185_010 | 0                   | 0      | 0     | 0       | 0      | 0            | 1                        | 0                    | 0                 | 0               | 0               | 0           | 0                                | 0                   |

| Sampling Sites | Sample ID | Above the Dams (AD) |        |       |         |        | In Between the Dams (ID) |         |                      |                   |                 |                 |             | South Branch Little River (SBLR) | Below the Dams (BD) |
|----------------|-----------|---------------------|--------|-------|---------|--------|--------------------------|---------|----------------------|-------------------|-----------------|-----------------|-------------|----------------------------------|---------------------|
|                |           | Chicag<br>o<br>Camp | Wilder | Hayes | Elkhorn | Geyser | Cat<br>Creek             | Altaire | Campgrou<br>nd Creek | Madiso<br>n Creek | Little<br>River | Indian<br>Creek | Aldwel<br>l |                                  |                     |
| Whiskey Bend   | 34185_011 | 0                   | 0      | 0     | 0       | 0      | 0                        | 0       | 0                    | 0                 | 1               | 0               | 0           | 0                                | 0                   |
| Whiskey Bend   | 34185_012 | 0                   | 0      | 0     | 0       | 0      | 0                        | 0.801   | 0.003                | 0.195             | 0               | 0               | 0.001       | 0                                | 0                   |
| Whiskey Bend   | 34185_013 | 0                   | 0      | 0     | 0       | 0      | 0                        | 0       | 1                    | 0                 | 0               | 0               | 0           | 0                                | 0                   |
| Whiskey Bend   | 34185_014 | 0                   | 0      | 0     | 0       | 0      | 0                        | 0       | 0                    | 0                 | 1               | 0               | 0           | 0                                | 0                   |
| Whiskey Bend   | 34185_015 | 0                   | 0      | 0     | 0       | 0      | 0                        | 0.001   | 0                    | 0                 | 0.999           | 0               | 0           | 0                                | 0                   |
| Whiskey Bend   | 34185_016 | 0                   | 0      | 0     | 0       | 0      | 0                        | 0       | 0                    | 0                 | 1               | 0               | 0           | 0                                | 0                   |
| Whiskey Bend   | 34185_017 | 0                   | 0      | 0     | 0       | 0      | 0                        | 0.149   | 0.003                | 0.849             | 0               | 0               | 0           | 0                                | 0                   |
| Whiskey Bend   | 34185_018 | 0                   | 0      | 0     | 0       | 0      | 0                        | 0       | 0                    | 0                 | 1               | 0               | 0           | 0                                | 0                   |
| Whiskey Bend   | 34185_019 | 0                   | 0      | 0     | 0       | 0      | 0                        | 1       | 0                    | 0                 | 0               | 0               | 0           | 0                                | 0                   |
| Whiskey Bend   | 34185_020 | 0                   | 0      | 0     | 0       | 0      | 0                        | 0       | 0                    | 0                 | 1               | 0               | 0           | 0                                | 0                   |
| Whiskey Bend   | 34185_021 | 0                   | 0      | 0     | 0       | 0      | 0                        | 0       | 0                    | 0                 | 0               | 0               | 0           | 0                                | 1                   |
| Whiskey Bend   | 34185_022 | 0                   | 0      | 0     | 0       | 0      | 0                        | 0.026   | 0                    | 0                 | 0.974           | 0               | 0           | 0                                | 0                   |
| Whiskey Bend   | 34185_023 | 0                   | 0      | 0     | 0       | 0      | 0                        | 0       | 0                    | 0                 | 1               | 0               | 0           | 0                                | 0                   |
| Whiskey Bend   | 34185_024 | 0                   | 0      | 0     | 0       | 0      | 0                        | 0.002   | 0                    | 0                 | 0.997           | 0               | 0           | 0                                | 0                   |
| Whiskey Bend   | 34185_025 | 0                   | 0      | 0     | 0       | 0      | 0                        | 0       | 0                    | 0                 | 1               | 0               | 0           | 0                                | 0                   |

| Sampling Sites | Sample ID | Above the Dams (AD) |        |       |         |        | In Between the Dams (ID) |         |                  |               |              |              |         | South Branch Little River (SBLR) | Below the Dams (BD) |
|----------------|-----------|---------------------|--------|-------|---------|--------|--------------------------|---------|------------------|---------------|--------------|--------------|---------|----------------------------------|---------------------|
|                |           | Chicago Camp        | Wilder | Hayes | Elkhorn | Geyser | Cat Creek                | Altaire | Campground Creek | Madison Creek | Little River | Indian Creek | Aldwell |                                  |                     |
| Cat Creek      | 34188_001 | 0                   | 0      | 0     | 0       | 0      | 0                        | 0       | 0                | 0             | 1            | 0            | 0       | 0                                | 0                   |
| Cat Creek      | 34188_003 | 0                   | 0      | 0     | 0       | 0      | 0.948                    | 0       | 0                | 0             | 0.052        | 0            | 0       | 0                                | 0                   |
| Cat Creek      | 34188_004 | 0                   | 0      | 0     | 0       | 0      | 0                        | 0       | 1                | 0             | 0            | 0            | 0       | 0                                | 0                   |
| Cat Creek      | 34188_005 | 0                   | 0      | 0     | 0.781   | 0      | 0                        | 0       | 0                | 0             | 0            | 0            | 0       | 0                                | 0.22                |
| Cat Creek      | 34188_006 | 0                   | 0      | 0     | 0       | 0      | 0                        | 0       | 0                | 0             | 1            | 0            | 0       | 0                                | 0                   |
| Cat Creek      | 34188_007 | 0                   | 0      | 0     | 0       | 0      | 0                        | 0       | 0                | 1             | 0            | 0            | 0       | 0                                | 0                   |
| Cat Creek      | 34188_009 | 0                   | 0      | 0     | 0       | 0      | 0                        | 0.073   | 0.927            | 0             | 0            | 0            | 0       | 0                                | 0                   |
| Cat Creek      | 34188_010 | 0                   | 0      | 0     | 0       | 0      | 0                        | 0       | 0                | 0             | 1            | 0            | 0       | 0                                | 0                   |
| Cat Creek      | 34188_012 | 0                   | 0      | 0     | 0       | 0      | 0                        | 1       | 0                | 0             | 0            | 0            | 0       | 0                                | 0                   |
| Cat Creek      | 34188_013 | 0                   | 0      | 0     | 0       | 0      | 0                        | 0.999   | 0                | 0             | 0.001        | 0            | 0       | 0                                | 0                   |
| Cat Creek      | 34188_014 | 0                   | 0      | 0     | 0       | 0      | 1                        | 0       | 0                | 0             | 0            | 0            | 0       | 0                                | 0                   |
| Cat Creek      | 34188_015 | 0                   | 0      | 0     | 0       | 0      | 1                        | 0       | 0                | 0             | 0            | 0            | 0       | 0                                | 0                   |
| Cat Creek      | 34188_016 | 0                   | 0      | 0     | 0       | 0      | 0                        | 0.001   | 0.991            | 0             | 0            | 0            | 0.008   | 0                                | 0                   |
| Cat Creek      | 34188_019 | 0                   | 0      | 0     | 0       | 0      | 0                        | 0       | 0                | 0.002         | 0.998        | 0            | 0       | 0                                | 0                   |
| Cat Creek      | 34188_021 | 0                   | 0      | 0     | 0       | 0      | 0                        | 1       | 0                | 0             | 0            | 0            | 0       | 0                                | 0                   |

| Sampling Sites   | Sample ID | Above the Dams (AD) |        |       |         |        | In Between the Dams (ID) |         |                  |               |              |              |         | South Branch Little River (SBLR) | Below the Dams (BD) |
|------------------|-----------|---------------------|--------|-------|---------|--------|--------------------------|---------|------------------|---------------|--------------|--------------|---------|----------------------------------|---------------------|
|                  |           | Chicago Camp        | Wilder | Hayes | Elkhorn | Geyser | Cat Creek                | Altaire | Campground Creek | Madison Creek | Little River | Indian Creek | Aldwell |                                  |                     |
| Cat Creek        | 34188_022 | 0                   | 0      | 0     | 0       | 0      | 0                        | 0       | 0                | 0.129         | 0.871        | 0            | 0       | 0                                | 0                   |
| Cat Creek        | 34188_011 | 0                   | 0      | 0     | 0       | 0      | 0.932                    | 0.067   | 0                | 0             | 0            | 0            | 0       | 0                                | 0                   |
| Altaire          | 33694_027 | 0                   | 0      | 0     | 0       | 0      | 0                        | 0       | 0.027            | 0.965         | 0.004        | 0            | 0.005   | 0                                | 0                   |
| Altaire          | 33694_058 | 0                   | 0      | 0     | 0       | 0      | 0                        | 0.995   | 0.003            | 0             | 0.002        | 0            | 0       | 0                                | 0                   |
| Altaire          | 33694_095 | 0                   | 0      | 0     | 0       | 0      | 0                        | 1       | 0                | 0             | 0            | 0            | 0       | 0                                | 0                   |
| Altaire          | 33694_097 | 0                   | 0      | 0     | 0       | 0      | 0                        | 1       | 0                | 0             | 0            | 0            | 0       | 0                                | 0                   |
| Altaire          | 34189_003 | 0                   | 0      | 0     | 0       | 0      | 0                        | 0       | 1                | 0             | 0            | 0            | 0       | 0                                | 0                   |
| Campground Creek | 34190_001 | 0                   | 0      | 0     | 0       | 0      | 0                        | 0       | 0                | 0             | 1            | 0            | 0       | 0                                | 0                   |
| Campground Creek | 34190_005 | 0                   | 0      | 0     | 0       | 0      | 0                        | 0       | 0                | 0             | 1            | 0            | 0       | 0                                | 0                   |
| Campground Creek | 34190_008 | 0                   | 0      | 0     | 0       | 0      | 1                        | 0       | 0                | 0             | 0            | 0            | 0       | 0                                | 0                   |
| Campground Creek | 34190_012 | 0                   | 0      | 0     | 0       | 0      | 0                        | 0       | 0                | 0             | 1            | 0            | 0       | 0                                | 0                   |
| Campground Creek | 34190_017 | 0                   | 0      | 0     | 0       | 0      | 0                        | 0.002   | 0.998            | 0             | 0            | 0            | 0       | 0                                | 0                   |
| Campground Creek | 34190_019 | 0                   | 0      | 0     | 0       | 0      | 0                        | 0.965   | 0.035            | 0             | 0            | 0            | 0       | 0                                | 0                   |
| Campground Creek | 34190_020 | 0                   | 0      | 0     | 0       | 0      | 0                        | 0       | 1                | 0             | 0            | 0            | 0       | 0                                | 0                   |
| Campground Creek | 34190_024 | 0                   | 0      | 0     | 0       | 0      | 0                        | 1       | 0                | 0             | 0            | 0            | 0       | 0                                | 0                   |







Figures

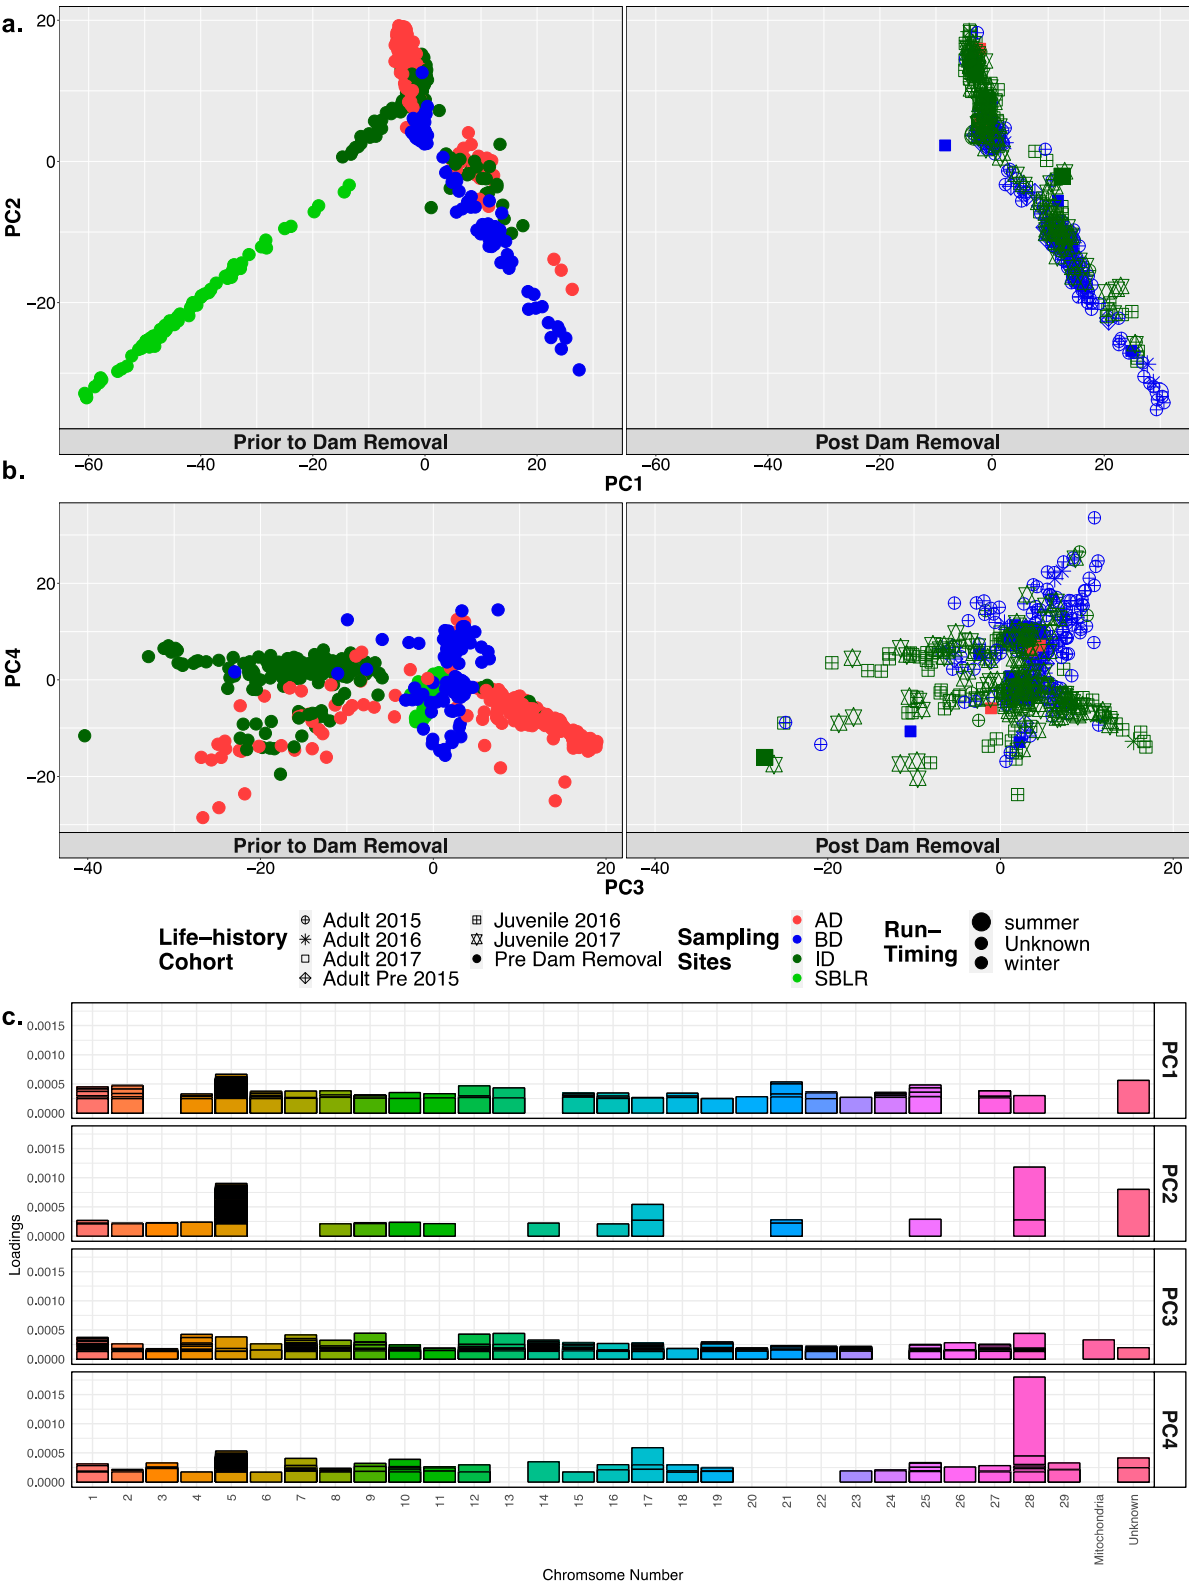

**Figure S1.** There were some discernible clustering patterns in the PCA conducted among all 71,320 SNPs used in this study among the samples collected prior to or following dam removal. Specifically, the South Branch of the Little River appeared to split from most of the AD, ID and BD populations along principal component one (proportion of variance explained = 2.87%) and from the remainder of the ID population along principal component two (2.12%) (a). There were no distinct clustering patterns in the PCA for principal components three (1.22%) and four (0.83%) (b). Points were colored based on the sampling site location relative to anadromous barrier. Point shapes were reflective of life history cohort and point size was indicative of known migratory life history phenotype. A large number of loci on Chromosome 5 (Omy5) loaded on the first, second, and fourth principal components and a small number of loci on Chromosome 28 (Omy28) with large loadings loaded on the second and fourth principal components (c). Each bar includes the top 1% SNPs across chromosomes loading on individual PCs. Black boxes within each bar represent a single SNP and the width of the black box is proportional to the cumulative proportion of the loadings explained by each SNP.

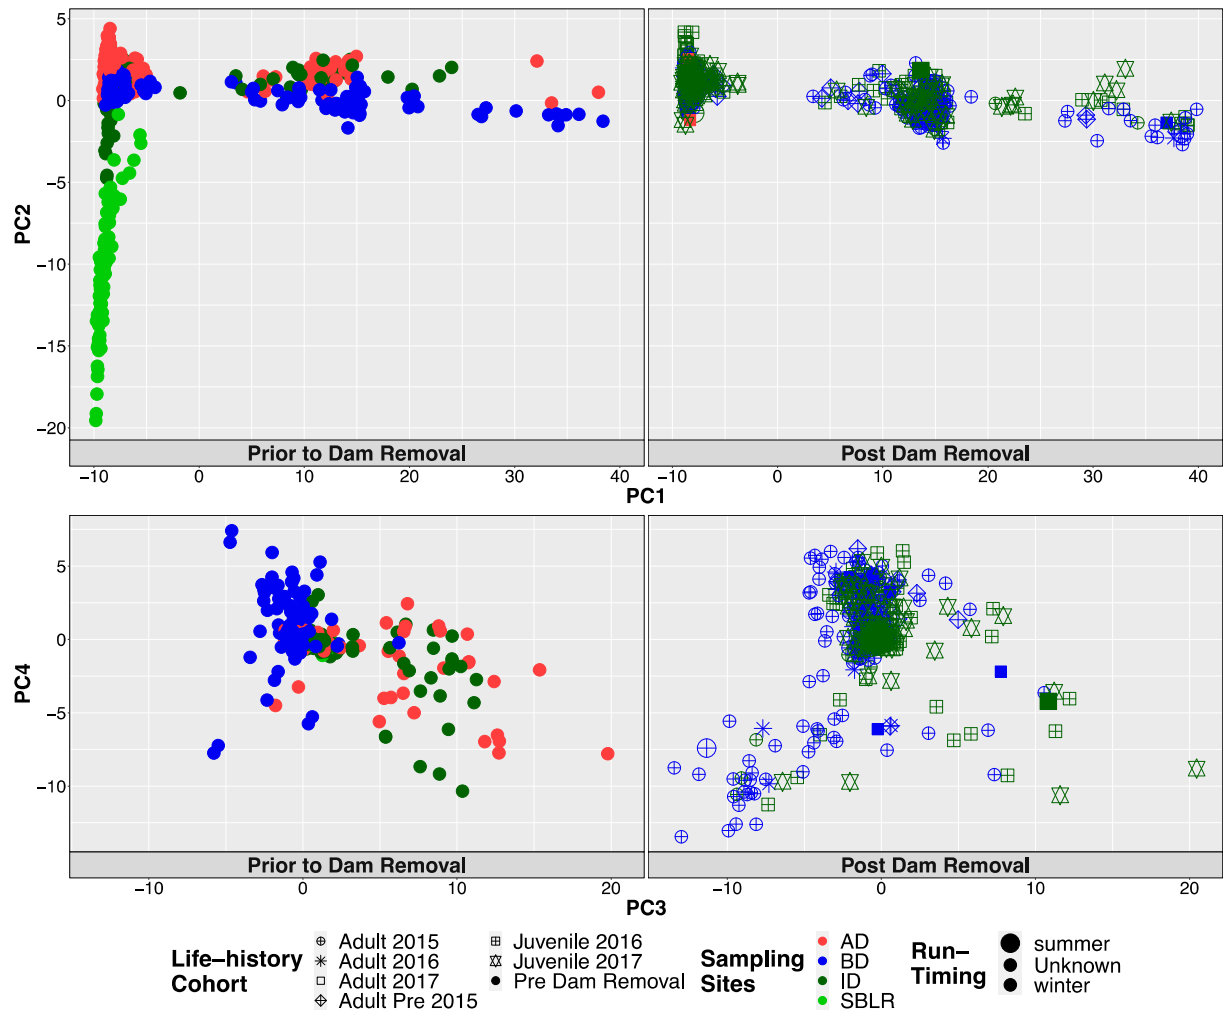

**Figure S2.** There were three distinct clusters in the PCA conducted among all 2,552 SNPs called on Omy5 among the samples collected prior to or following dam removal among principal components one (proportion of variance explained = 27.16%) and two (2.08%) (a), or three (1.59%) and four (1.28%) (b). Points were colored based on the sampling site location relative to anadromous barrier. Point shapes were reflective of life history cohort and point size was indicative of known migratory life history phenotype.

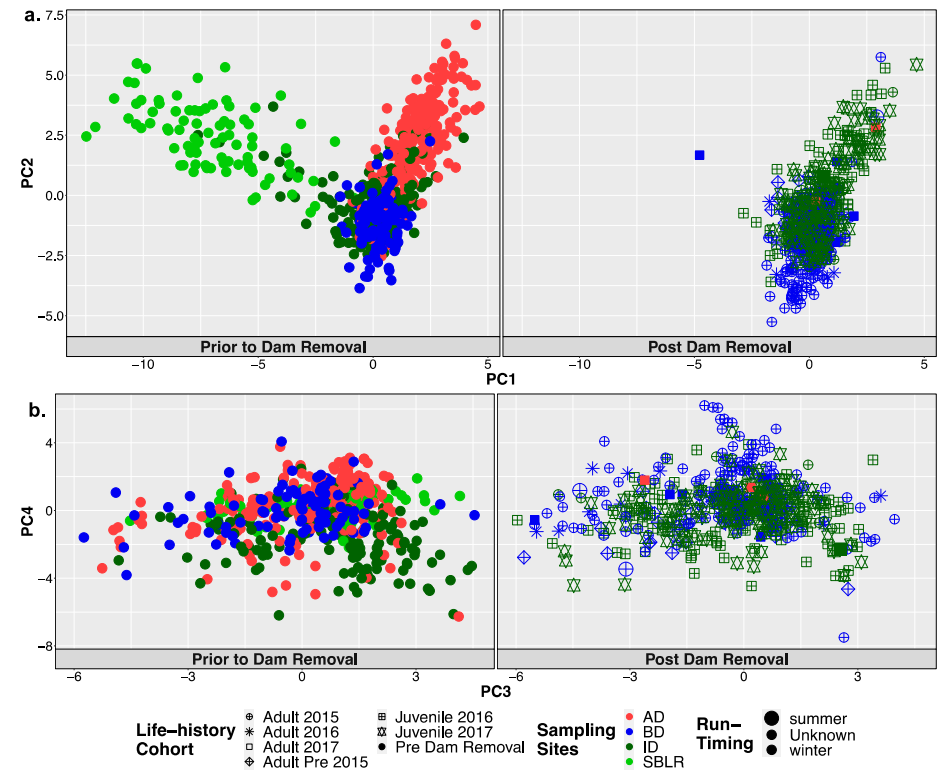

**Figure S3.** There were no discernible clustering patterns in the PCA conducted among the 202 SNPs called on Omy28 among the samples collected prior to or following dam removal among principal components one (proportion of variance explained = 3.18%) and two (2.37%) (a), or three (1.63%) and four (1.46%) (b). Points were colored based on the sampling site location relative to anadromous barrier. Point shapes were reflective of life history cohort and point size was indicative of known migratory life history phenotype.

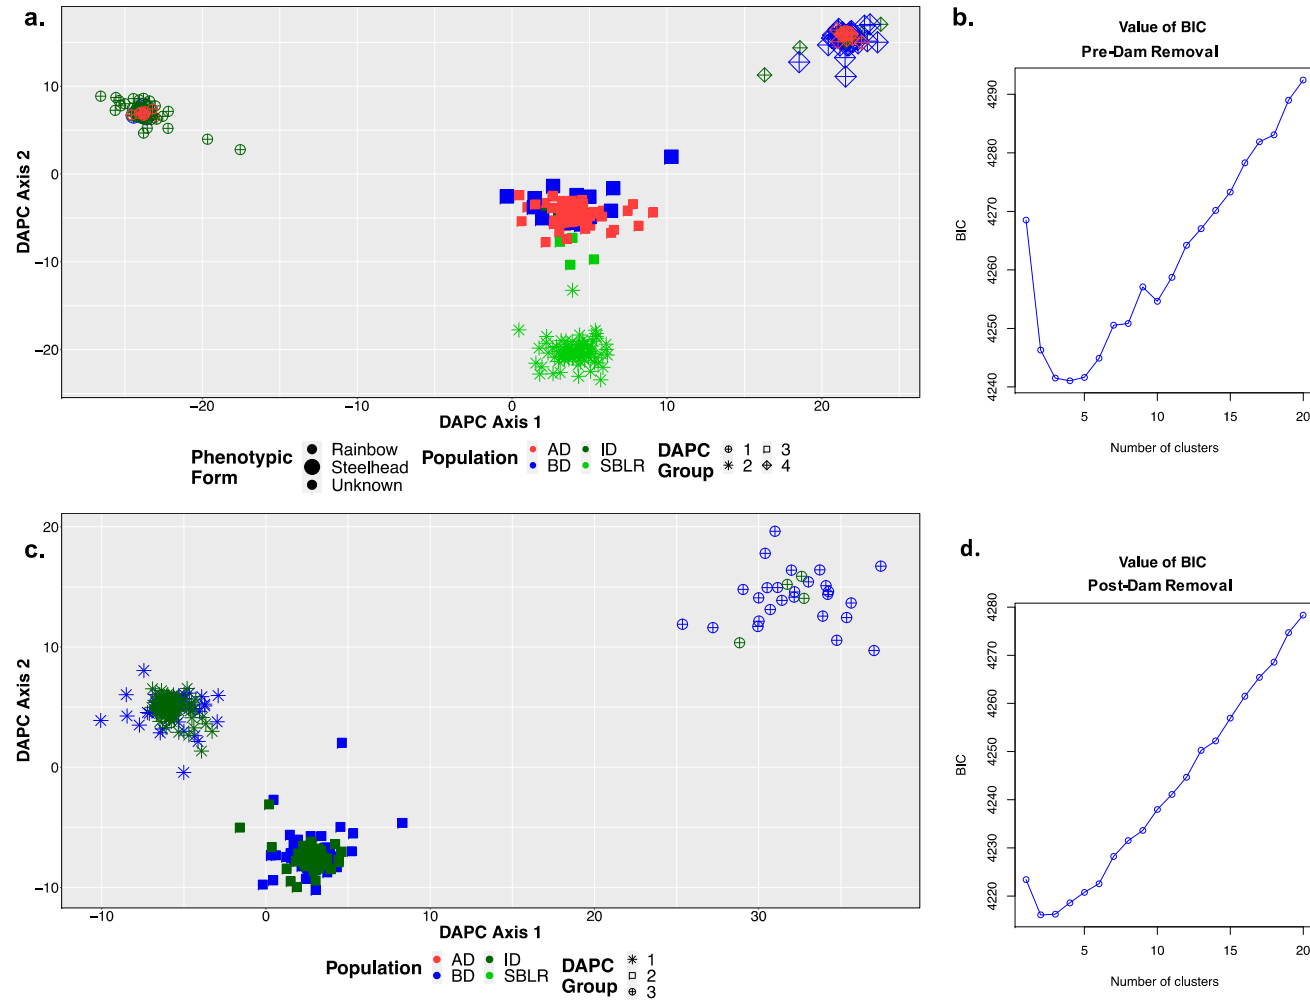

**Figure S4.** (a) DAPC results for the second-best K value (K=4) prior to dam removal and the (b) BIC plot. (c) The second-best supported structure model in DAPC post-dam removal was K=3 genetic clusters, (d) as shown by the elbow in the BIC plot. Shapes were indicative of population assignment by DAPC and color was based on sampling site location relative to the dams. Larger points in (a, b) were indicative of the Steelhead life history phenotypic form while smaller points were indicative of the resident Rainbow Trout form or fish that could not be categorized in either form. The elbow for BIC plots generated in DAPC genetic

structure analysis of RAD-Sequenced samples supported (a)  $K=3$  genetic clusters pre-dam removal (b) and  $K = 2$  genetic clusters post-dam removal shown in Figure 4.



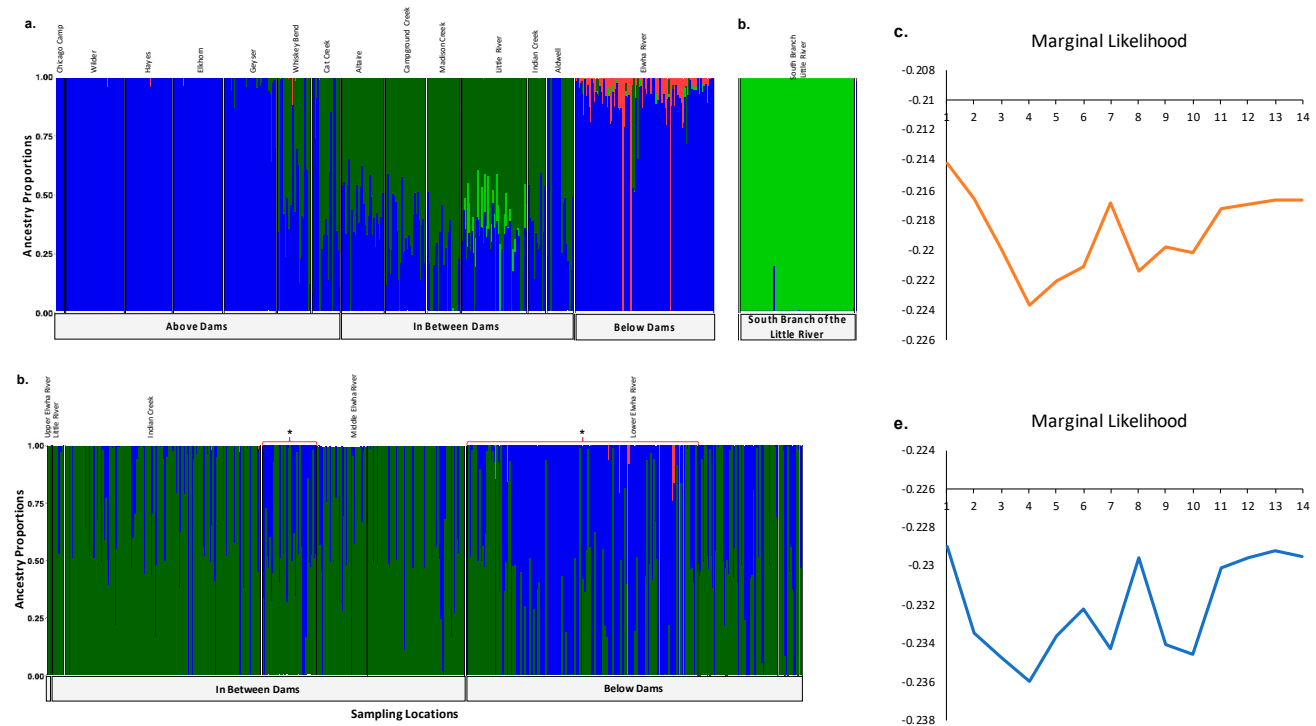

**Figure S5.** FastSTRUCTURE population assignments for samples collected (a-b) prior to dam removal and supported four distinct genetic clusters ( $K=4$ ). (a) High levels of genetic structure were observed among sampling locations split by dams (b) and natural barriers including South Branch Falls. (c) Marginal likelihood values were lowest at  $K=4$  prior to dam removal, but model components that explained structure support a  $K$ -value of 3 (Figure 4). (c) Post dam removal, we detected three genetic clusters respectively. (e) Marginal likelihood values were lowest at  $K=3$  post-dam removal, but model components that explained structure support  $K=2$  (Figure 4). Each vertical bar represents on fastSTRUCTURE plots (a-b,d) represented a single individual sampled at one of the sampling sites labelled across the top x-axis which are organized from up-river to down river and divided by anadromous barrier location which are labelled on the bottom x-axis. The left-most samples in the plot, denoted by an empty gray box that is unlabeled, include sampled from above the dams, furthest up-river. Each color represents a distinct genetic cluster. The red brackets and asterisks represent the individuals sampled post-dam removal that were identified as hatchery-origin fish.

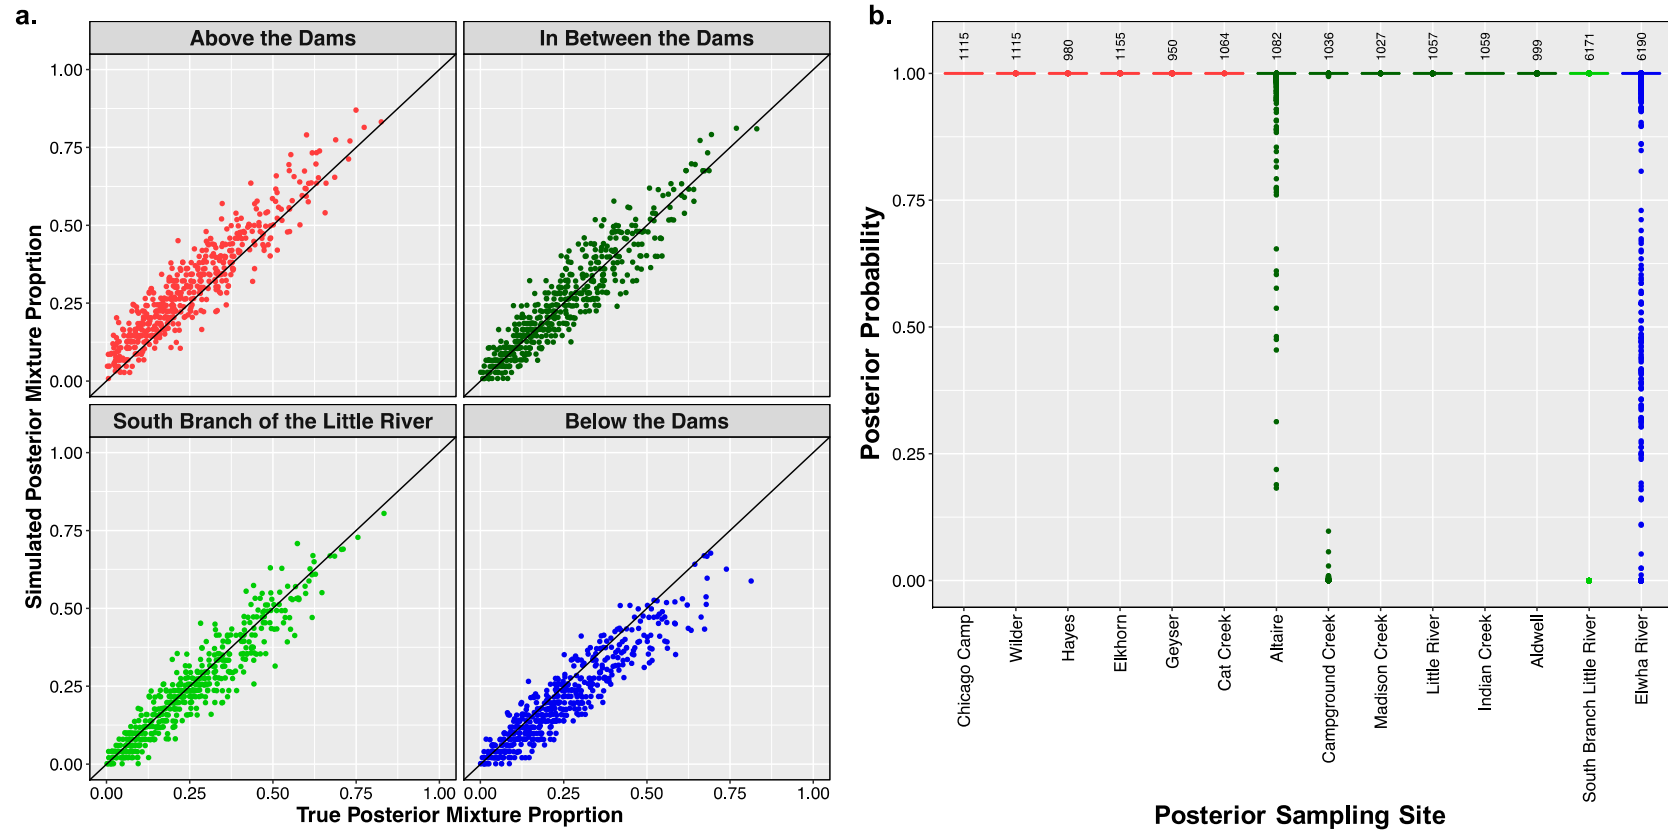

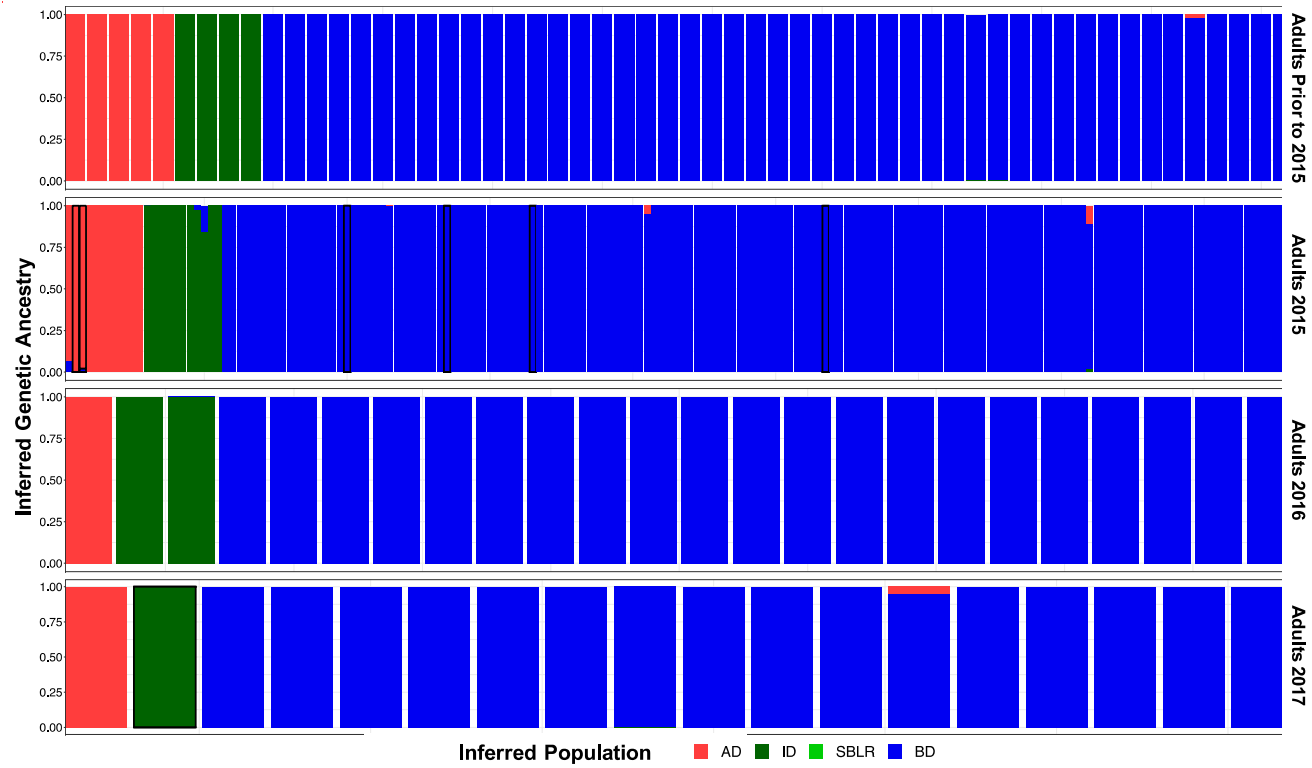

**Figure S7.** The majority of GSI assignments computed by RUBIAS for adult Steelhead collected post dam removal were to BD reference collections and no individuals were assigned back to the SBLR. Each vertical bar represents a single individual from one adult cohort labelled along the right y-axis. Colors represented the reference reporting unit or sampling location on the Elwha River. Adult individuals that were known to be summer Steelhead have a black outline.

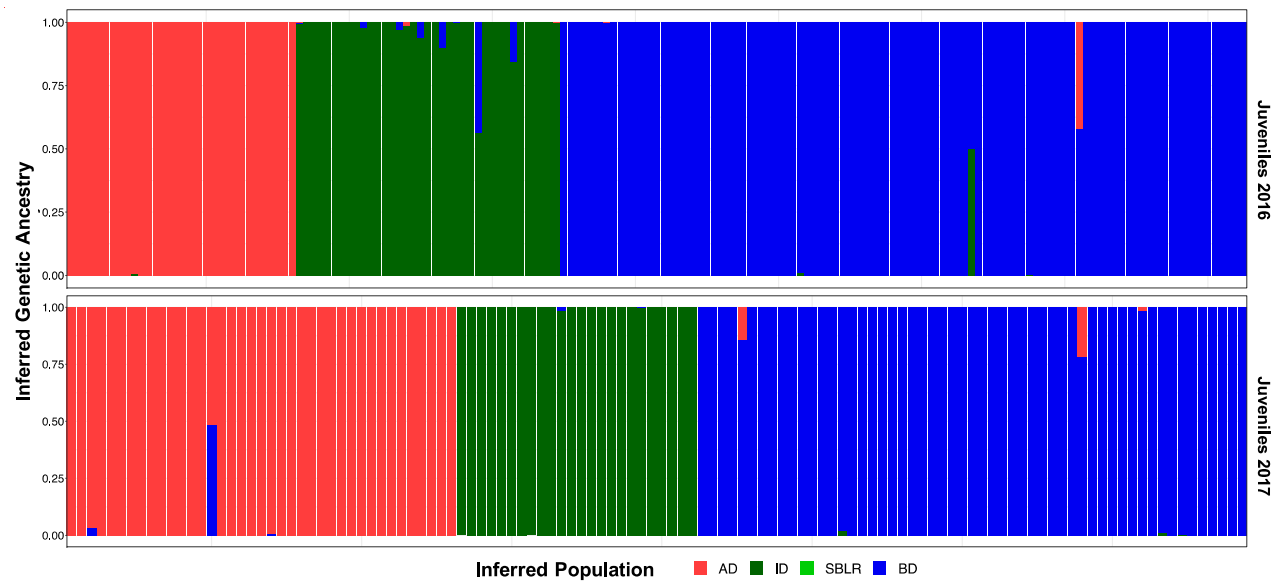

**Figure S8.** The majority of GSI assignments computed by RUBIAS for juvenile smolts collected post dam removal were to BD ID or AD reference collections. No individuals were assigned back to the SBLR. Each vertical bar represents a single individual from one adult cohort labelled along the right y-axis. Colors represented the reference reporting unit or sampling location on the Elwha River.

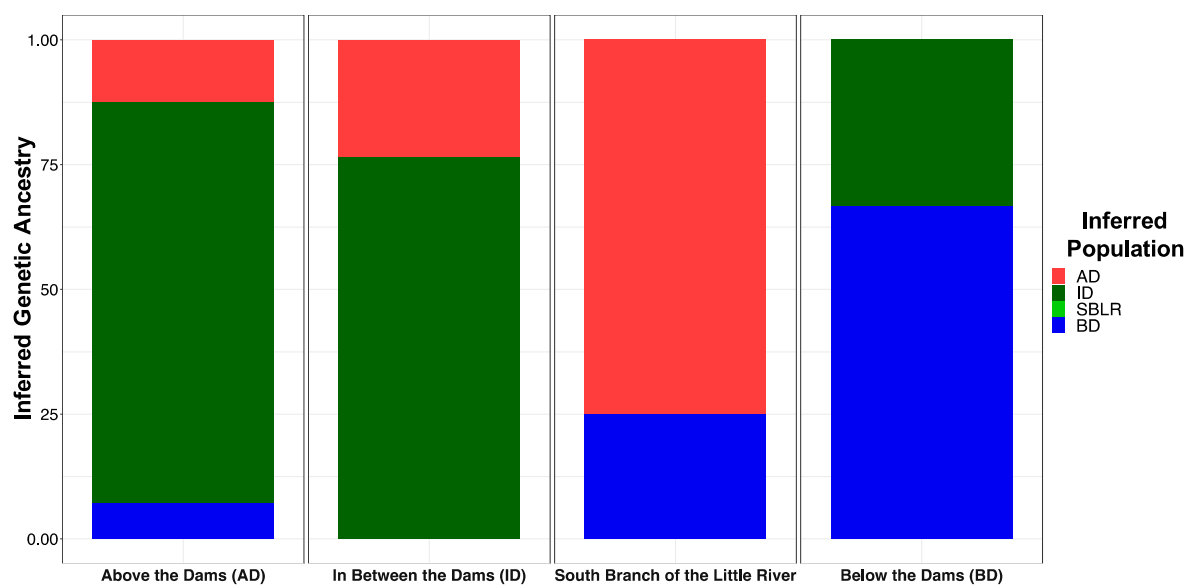

**Figure S9.** Inferred proportions of genetic ancestry from each of the four reference reporting units assigned to the 85 individuals sampled prior to dam removal with discordant DAPC population and sampling location assignments. These samples were assigned to the “prior to dam removal” mixture collection in our GSI analysis of sample set one. Colors are representative of the inferred reporting unit. The bottom x-axis divides sampling locations by relative anadromous barrier location.
